# Supplementary material for: DOCK8 Serves as a Prognostic Biomarker and Is Related to Immune Infiltration in Patients With HPV Positive Head and Neck Squamous Cell Carcinoma
Source: PubMed Central journal article supplement — Cancer Control. 2021 Apr 29;28:10732748211011951. doi: 10.1177/10732748211011951 (PMC8482706; doi:10.1177/10732748211011951), 2021-04-29
Supplement: sj-pdf-1-ccx-10.1177_10732748211011951.pdf [file sj-pdf-1-ccx-10.1177_10732748211011951.pdf]

**Supplementary Table 1. The details of GSEA on DOCK8 in patients with HPV-positive HNSCC.**

| <b>Gene sets</b>                   | <b>Normalized enrichment scores</b> | <b><i>P</i>-value</b> | <b>FDR q value</b> |
|------------------------------------|-------------------------------------|-----------------------|--------------------|
| HALLMARK MYC TARGETS V1            | 2.81                                | 0.00                  | 0.00               |
| HALLMARK OXIDATIVE PHOSPHORYLATION | 2.17                                | 0.00                  | 0.00               |
| HALLMARK MYC TARGETS V2            | 1.69                                | 0.00                  | 0.01               |
| HALLMARK P53 PATHWAY               | 1.52                                | 0.00                  | 0.05               |
| HALLMARK DNA REPAIR                | 1.33                                | 0.00                  | 0.12               |
| HALLMARK ALLOGRAFT REJECTION       | -2.13                               | 0.00                  | 0.00               |
| HALLMARK INFLAMMATORY RESPONSE     | -1.75                               | 0.00                  | 0.00               |
| HALLMARK IL2 STAT5 SIGNALING       | -1.66                               | 0.00                  | 0.00               |
| HALLMARK IL6 JAK STAT3 SIGNALING   | -1.62                               | 0.00                  | 0.00               |
| HALLMARK MYOGENESIS                | -1.61                               | 0.00                  | 0.00               |
| HALLMARK KRAS SIGNALING UP         | -1.51                               | 0.00                  | 0.02               |
| HALLMARK COMPLEMENT                | -1.50                               | 0.00                  | 0.02               |
| HALLMARK INTERFERON GAMMA RESPONSE | -1.49                               | 0.00                  | 0.02               |
| HALLMARK ANGIOGENESIS              | -1.39                               | 0.00                  | 0.05               |
